# Supplementary material for: Effectiveness of mRNA-1273, BNT162b2, and BBIBP-CorV vaccines against infection and mortality in children in Argentina, during predominance of delta and omicron covid-19 variants: test negative, case-control study
Source: PubMed Central journal article supplement — BMJ. 2022 Nov 30;379:e073070. doi: 10.1136/bmj-2022-073070 (PMC9709697; doi:10.1136/bmj-2022-073070), 2022-11-30
Supplement: casj073070.ww1.pdf [file casj073070.ww1.pdf]

**Table A:** Case population characteristics by test result and vaccination status.

|                                               | Test result     |               |               |               | Vaccination Status |                      |                  |               |              |              |
|-----------------------------------------------|-----------------|---------------|---------------|---------------|--------------------|----------------------|------------------|---------------|--------------|--------------|
|                                               | Overall         | Negative      | Positive      | p             | Unvaccinated       | Partially vaccinated | Fully vaccinated | Boosted       | Other*       |              |
| <b>n</b>                                      | 844,460         | 613279        | 231181        |               | 291070             | 112542               | 334171           | 10937         | 95740        |              |
| <b>Any comorbidity (%)</b>                    | No              | 802548 (95.0) | 583393 (95.1) | 219155 (94.8) | <0.001             | 272720 (93.7)        | 107126 (95.2)    | 321064 (96.1) | 10755 (98.3) | 90883 (94.9) |
|                                               | Yes             | 41912 (5.0)   | 29886 (4.9)   | 12026 (5.2)   |                    | 18350 (6.3)          | 5416 (4.8)       | 13107 (3.9)   | 182 (1.7)    | 4857 (5.1)   |
| <b>Sex (%)</b>                                | Female          | 423757 (50.2) | 302251 (49.3) | 121506 (52.6) | <0.001             | 142045 (48.8)        | 55780 (49.6)     | 172538 (51.6) | 5505 (50.3)  | 47889 (50.0) |
|                                               | Male            | 420703 (49.8) | 311028 (50.7) | 109675 (47.4) |                    | 149025 (51.2)        | 56762 (50.4)     | 161633 (48.4) | 5432 (49.7)  | 47851 (50.0) |
| <b>Type of test (%)</b>                       | RT-PCR          | 421359 (49.9) | 341401 (55.7) | 79958 (34.6)  | <0.001             | 171839 (59.0)        | 53912 (47.9)     | 140544 (42.1) | 7173 (65.6)  | 47891 (50.0) |
|                                               | Antigen         | 423101 (50.1) | 271878 (44.3) | 151223 (65.4) |                    | 119231 (41.0)        | 58630 (52.1)     | 193627 (57.9) | 3764 (34.4)  | 47849 (50.0) |
| <b>Week of diagnosis (mean(SD))</b>           |                 | 14.6 (7.8)    | 13.5 (8.6)    | 17.6 (3.9)    | <0.001             | 9.1 (7.7)            | 15.6 (6.4)       | 19.1 (5.1)    | 25.4 (4.5)   | 13.4 (6.6)   |
| <b>Age group (%)</b>                          | 3-11 years old  | 478122 (56.6) | 362634 (59.1) | 115488 (50.0) | <0.001             | 200993 (69.1)        | 66754 (59.3)     | 154698 (46.3) | 903 (8.3)    | 54774 (57.2) |
|                                               | 12-17 years old | 366338 (43.4) | 250645 (40.9) | 115693 (50.0) |                    | 90077 (30.9)         | 45788 (40.7)     | 179473 (53.7) | 10034 (91.7) | 40966 (42.8) |
| <b>Time since second dose vaccination (%)</b> | < 60 days       | 455107 (70.2) | 354615 (74.8) | 100492 (57.5) | <0.001             |                      |                  | 160840 (48.1) |              |              |
|                                               | ≥ 60 days       | 193562 (29.8) | 119187 (25.2) | 74375 (42.5)  |                    |                      |                  | 173331 (51.9) |              |              |

\*Includes those who were vaccinated in the two weeks prior to their test, those who received another vaccine, and those with inconsistent or incomplete vaccination data.

**Table B:** Unmatched population province distribution.

|                            | Test result      |                  |                 | Vaccination status |                      |                  |                |                 |
|----------------------------|------------------|------------------|-----------------|--------------------|----------------------|------------------|----------------|-----------------|
|                            | Overall          | Negative         | Positive        | Unvaccinated       | Partially vaccinated | Fully vaccinated | Boosted        | Other           |
| <b>Buenos Aires</b>        | 312877<br>(37.1) | 234622<br>(38.3) | 78255<br>(33.9) | 108299<br>(37.2)   | 40690<br>(36.2)      | 125796<br>(37.6) | 3187<br>(29.1) | 34905<br>(36.5) |
| <b>CABA</b>                | 162675<br>(19.3) | 120344<br>(19.6) | 42331<br>(18.3) | 69633<br>(23.9)    | 13352<br>(11.9)      | 58497<br>(17.5)  | 2627<br>(24.0) | 18566<br>(19.4) |
| <b>Catamarca</b>           | 8754<br>(1.0)    | 6380<br>(1.0)    | 2374<br>(1.0)   | 2773<br>(1.0)      | 1338<br>(1.2)        | 3652<br>(1.1)    | 42<br>(0.4)    | 949<br>(1.0)    |
| <b>Chaco</b>               | 14018<br>(1.7)   | 10652<br>(1.7)   | 3366<br>(1.5)   | 5212<br>(1.8)      | 2328<br>(2.1)        | 4591<br>(1.4)    | 66<br>(0.6)    | 1821<br>(1.9)   |
| <b>Chubut</b>              | 3245<br>(0.4)    | 2441<br>(0.4)    | 804<br>(0.3)    | 1381<br>(0.5)      | 481<br>(0.4)         | 1020<br>(0.3)    | 21<br>(0.2)    | 342<br>(0.4)    |
| <b>Corrientes</b>          | 10389<br>(1.2)   | 7928<br>(1.3)    | 2461<br>(1.1)   | 2577<br>(0.9)      | 2501<br>(2.2)        | 3443<br>(1.0)    | 36<br>(0.3)    | 1832<br>(1.9)   |
| <b>Córdoba</b>             | 106479<br>(12.6) | 58707<br>(9.6)   | 47772<br>(20.7) | 31188<br>(10.7)    | 16255<br>(14.4)      | 47156<br>(14.1)  | 265<br>(2.4)   | 11615<br>(12.1) |
| <b>Entre Ríos</b>          | 9182<br>(1.1)    | 6667<br>(1.1)    | 2515<br>(1.1)   | 3387<br>(1.2)      | 1303<br>(1.2)        | 3529<br>(1.1)    | 34<br>(0.3)    | 929<br>(1.0)    |
| <b>Formosa</b>             | 23767<br>(2.8)   | 18156<br>(3.0)   | 5611<br>(2.4)   | 3895<br>(1.3)      | 4454<br>(4.0)        | 9161<br>(2.7)    | 3451<br>(31.6) | 2806<br>(2.9)   |
| <b>Jujuy</b>               | 8333<br>(1.0)    | 6342<br>(1.0)    | 1991<br>(0.9)   | 2850<br>(1.0)      | 1775<br>(1.6)        | 2698<br>(0.8)    | 34<br>(0.3)    | 976<br>(1.0)    |
| <b>La Pampa</b>            | 14465<br>(1.7)   | 9548<br>(1.6)    | 4917<br>(2.1)   | 3281<br>(1.1)      | 1032<br>(0.9)        | 8425<br>(2.5)    | 196<br>(1.8)   | 1531<br>(1.6)   |
| <b>La Rioja</b>            | 4643<br>(0.5)    | 3484<br>(0.6)    | 1159<br>(0.5)   | 1077<br>(0.4)      | 535<br>(0.5)         | 2516<br>(0.8)    | 45<br>(0.4)    | 470<br>(0.5)    |
| <b>Mendoza</b>             | 22408<br>(2.7)   | 18359<br>(3.0)   | 4049<br>(1.8)   | 9088<br>(3.1)      | 3400<br>(3.0)        | 7643<br>(2.3)    | 121<br>(1.1)   | 2156<br>(2.3)   |
| <b>Misiones</b>            | 1653<br>(0.2)    | 888<br>(0.1)     | 765<br>(0.3)    | 696<br>(0.2)       | 280<br>(0.2)         | 474<br>(0.1)     | 35<br>(0.3)    | 168<br>(0.2)    |
| <b>Neuquén</b>             | 5306<br>(0.6)    | 4501<br>(0.7)    | 805<br>(0.3)    | 2249<br>(0.8)      | 844<br>(0.7)         | 1584<br>(0.5)    | 37<br>(0.3)    | 592<br>(0.6)    |
| <b>Río Negro</b>           | 8697<br>(1.0)    | 7030<br>(1.1)    | 1667<br>(0.7)   | 2431<br>(0.8)      | 1517<br>(1.3)        | 3397<br>(1.0)    | 42<br>(0.4)    | 1310<br>(1.4)   |
| <b>Salta</b>               | 12527<br>(1.5)   | 9673<br>(1.6)    | 2854<br>(1.2)   | 4993<br>(1.7)      | 2324<br>(2.1)        | 3735<br>(1.1)    | 39<br>(0.4)    | 1436<br>(1.5)   |
| <b>San Juan</b>            | 15468<br>(1.8)   | 11275<br>(1.8)   | 4193<br>(1.8)   | 3932<br>(1.4)      | 2375<br>(2.1)        | 7444<br>(2.2)    | 69<br>(0.6)    | 1648<br>(1.7)   |
| <b>San Luis</b>            | 13766<br>(1.6)   | 9487<br>(1.5)    | 4279<br>(1.9)   | 4086<br>(1.4)      | 1414<br>(1.3)        | 5832<br>(1.7)    | 186<br>(1.7)   | 2248<br>(2.3)   |
| <b>Santa Cruz</b>          | 3362<br>(0.4)    | 2534<br>(0.4)    | 828<br>(0.4)    | 1166<br>(0.4)      | 531<br>(0.5)         | 1321<br>(0.4)    | 48<br>(0.4)    | 296<br>(0.3)    |
| <b>Santa Fe</b>            | 46251<br>(5.5)   | 36306<br>(5.9)   | 9945<br>(4.3)   | 15211<br>(5.2)     | 6931<br>(6.2)        | 18504<br>(5.5)   | 284<br>(2.6)   | 5321<br>(5.6)   |
| <b>Santiago del Estero</b> | 7255<br>(0.9)    | 6087<br>(1.0)    | 1168<br>(0.5)   | 1916<br>(0.7)      | 1047<br>(0.9)        | 3322<br>(1.0)    | 34<br>(0.3)    | 936<br>(1.0)    |
| <b>Tierra del Fuego</b>    | 1055<br>(0.1)    | 745<br>(0.1)     | 310<br>(0.1)    | 370<br>(0.1)       | 132<br>(0.1)         | 444<br>(0.1)     | 11<br>(0.1)    | 98<br>(0.1)     |

|                |                |                |               |               |               |               |             |               |
|----------------|----------------|----------------|---------------|---------------|---------------|---------------|-------------|---------------|
| <b>Tucumán</b> | 27885<br>(3.3) | 21123<br>(3.4) | 6762<br>(2.9) | 9379<br>(3.2) | 5703<br>(5.1) | 9987<br>(3.0) | 27<br>(0.2) | 2789<br>(2.9) |
|----------------|----------------|----------------|---------------|---------------|---------------|---------------|-------------|---------------|

**Table C:** Matched population province distribution.

|                            | Test result      |                 |                 | Vaccination status |                      |                  |                |                 |
|----------------------------|------------------|-----------------|-----------------|--------------------|----------------------|------------------|----------------|-----------------|
|                            | Overall          | Negative        | Positive        | Un-vaccinated      | Partially vaccinated | Fully vaccinated | Boosted        | Other           |
| <b>Buenos Aires</b>        | 111372<br>(40.0) | 55686<br>(40.0) | 55686<br>(40.0) | 23355<br>(38.8)    | 15522<br>(40.9)      | 61553<br>(40.8)  | 747<br>(19.9)  | 10195<br>(39.6) |
| <b>CABA</b>                | 37198<br>(13.3)  | 18599<br>(13.3) | 18599<br>(13.3) | 10006<br>(16.6)    | 3024<br>(8.0)        | 19722<br>(13.1)  | 695<br>(18.5)  | 3751<br>(14.6)  |
| <b>Catamarca</b>           | 3068<br>(1.1)    | 1534<br>(1.1)   | 1534<br>(1.1)   | 521<br>(0.9)       | 488<br>(1.3)         | 1776<br>(1.2)    | 4<br>(0.1)     | 279<br>(1.1)    |
| <b>Chaco</b>               | 5076<br>(1.8)    | 2538<br>(1.8)   | 2538<br>(1.8)   | 1360<br>(2.3)      | 943<br>(2.5)         | 2081<br>(1.4)    | 14<br>(0.4)    | 678<br>(2.6)    |
| <b>Chubut</b>              | 1028<br>(0.4)    | 514<br>(0.4)    | 514<br>(0.4)    | 281<br>(0.5)       | 184<br>(0.5)         | 447<br>(0.3)     | 7<br>(0.2)     | 109<br>(0.4)    |
| <b>Corrientes</b>          | 4068<br>(1.5)    | 2034<br>(1.5)   | 2034<br>(1.5)   | 679<br>(1.1)       | 863<br>(2.3)         | 2046<br>(1.4)    | 16<br>(0.4)    | 464<br>(1.8)    |
| <b>Córdoba</b>             | 38070<br>(13.7)  | 19035<br>(13.7) | 19035<br>(13.7) | 8243<br>(13.7)     | 5247<br>(13.8)       | 21344<br>(14.1)  | 76<br>(2.0)    | 3160<br>(12.3)  |
| <b>Entre Ríos</b>          | 3476<br>(1.2)    | 1738<br>(1.2)   | 1738<br>(1.2)   | 939<br>(1.6)       | 536<br>(1.4)         | 1695<br>(1.1)    | 4<br>(0.1)     | 302<br>(1.2)    |
| <b>Formosa</b>             | 10008<br>(3.6)   | 5004<br>(3.6)   | 5004<br>(3.6)   | 709<br>(1.2)       | 1447<br>(3.8)        | 481<br>7 (3.2)   | 2047<br>(54.5) | 988<br>(3.8)    |
| <b>Jujuy</b>               | 2360<br>(0.8)    | 1180<br>(0.8)   | 1180<br>(0.8)   | 567<br>(0.9)       | 559<br>(1.5)         | 956<br>(0.6)     | 2<br>(0.1)     | 276<br>(1.1)    |
| <b>La Pampa</b>            | 6848<br>(2.5)    | 3424<br>(2.5)   | 3424<br>(2.5)   | 1039<br>(1.7)      | 413<br>(1.1)         | 4822<br>(3.2)    | 28<br>(0.7)    | 546<br>(2.1)    |
| <b>La Rioja</b>            | 1208<br>(0.4)    | 604<br>(0.4)    | 604<br>(0.4)    | 154<br>(0.3)       | 109<br>(0.3)         | 842<br>(0.6)     | 8<br>(0.2)     | 95<br>(0.4)     |
| <b>Mendoza</b>             | 6762<br>(2.4)    | 3381<br>(2.4)   | 3381<br>(2.4)   | 1769<br>(2.9)      | 1243<br>(3.3)        | 3120<br>(2.1)    | 5<br>(0.1)     | 625<br>(2.4)    |
| <b>Misiones</b>            | 450<br>(0.2)     | 225<br>(0.2)    | 225<br>(0.2)    | 170<br>(0.3)       | 91<br>(0.2)          | 119<br>(0.1)     | 11<br>(0.3)    | 59<br>(0.2)     |
| <b>Neuquén</b>             | 1004<br>(0.4)    | 502<br>(0.4)    | 502<br>(0.4)    | 299<br>(0.5)       | 184<br>(0.5)         | 390<br>(0.3)     | 5<br>(0.1)     | 126<br>(0.5)    |
| <b>Río Negro</b>           | 1946<br>(0.7)    | 973<br>(0.7)    | 973<br>(0.7)    | 527<br>(0.9)       | 270<br>(0.7)         | 950<br>(0.6)     | 9<br>(0.2)     | 190<br>(0.7)    |
| <b>Salta</b>               | 4260<br>(1.5)    | 2130<br>(1.5)   | 2130<br>(1.5)   | 1435<br>(2.4)      | 808<br>(2.1)         | 1526<br>(1.0)    | 14<br>(0.4)    | 477<br>(1.9)    |
| <b>San Juan</b>            | 7906<br>(2.8)    | 3953<br>(2.8)   | 3953<br>(2.8)   | 1294<br>(2.1)      | 1297<br>(3.4)        | 4630<br>(3.1)    | 8<br>(0.2)     | 677<br>(2.6)    |
| <b>San Luis</b>            | 4128<br>(1.5)    | 2064<br>(1.5)   | 2064<br>(1.5)   | 797<br>(1.3)       | 355<br>(0.9)         | 2627<br>(1.7)    | 10<br>(0.3)    | 339<br>(1.3)    |
| <b>Santa Cruz</b>          | 992<br>(0.4)     | 496<br>(0.4)    | 496<br>(0.4)    | 208<br>(0.3)       | 161<br>(0.4)         | 530<br>(0.4)     | 14<br>(0.4)    | 79<br>(0.3)     |
| <b>Santa Fe</b>            | 13956<br>(5.0)   | 6978<br>(5.0)   | 6978<br>(5.0)   | 2620<br>(4.4)      | 1490<br>(3.9)        | 8658<br>(5.7)    | 21<br>(0.6)    | 1167<br>(4.5)   |
| <b>Santiago del Estero</b> | 1552<br>(0.6)    | 776<br>(0.6)    | 776<br>(0.6)    | 241<br>(0.4)       | 208<br>(0.5)         | 927<br>(0.6)     | 2<br>(0.1)     | 174<br>(0.7)    |
| <b>Tierra del Fuego</b>    | 310<br>(0.1)     | 155<br>(0.1)    | 155<br>(0.1)    | 67<br>(0.1)        | 35<br>(0.1)          | 174<br>(0.1)     | 3<br>(0.1)     | 31<br>(0.1)     |
| <b>Tucumán</b>             | 11596<br>(4.2)   | 5798<br>(4.2)   | 5798<br>(4.2)   | 2925<br>(4.9)      | 2464<br>(6.5)        | 5214<br>(3.5)    | 5<br>(0.1)     | 988<br>(3.8)    |

**Table D:** Bootstrapping based-confidence intervals versus main analysis.

| Age group       | Study period   | Main analysis<br>VE (CI 95%) | Bootstrapping based<br>VE (Q2.5-Q97.5) |
|-----------------|----------------|------------------------------|----------------------------------------|
| All ages        | Delta period   | 64.2 (61.7 to 66.5)          | 64.1 (62.3 to 65.9)                    |
|                 | Omicron period | 19.9% (18.0 to 21.8)         | 19.9% (18.5 to 21.4)                   |
| 3-11 years old  | Delta period   | 61.2 (56.4 to 65.6)          | 61.2 (57.7 to 64.3)                    |
|                 | Omicron period | 16.0 (13.2 to 18.6)          | 16.0 (13.8 to 17.9)                    |
| 12-17 years old | Delta period   | 66.8 (63.9 to 69.5)          | 66.8 (64.8 to 68.9)                    |
|                 | Omicron period | 26.0 (23.2 to 28.8)          | 26.1 (23.9 to 28.1)                    |

**Table E:** VE by days since last dose, age group and study period.

| Days since<br>last dose | Delta period                  |                                | Omicron period                |                                |
|-------------------------|-------------------------------|--------------------------------|-------------------------------|--------------------------------|
|                         | 3-11 years old<br>VE (CI 95%) | 12-17 years old<br>VE (CI 95%) | 3-11 years old<br>VE (CI 95%) | 12-17 years old<br>VE (CI 95%) |
| 15-30                   | 68.4 (64.1 to 72.2)           | 74.8 (71.3 to 77.9)            | 37.6 (34.2 to 40.8)           | 55.8 (52.4 to 59.0)            |
| 31-45                   | 55.5 (48.2 to 61.8)           | 64.9 (60.3 to 68.9)            | 29.4 (26.2 to 32.4)           | 43.7 (40.3 to 46.9)            |
| 45-60                   | 51.7 (32.8 to 65.3)           | 58.7 (53.0 to 63.7)            | 17.6 (14.1 to 20.9)           | 29.6 (25.9 to 33.1)            |
| 60+                     | 65.2 (44.0 to 78.4)           | 56.3 (50.2 to 61.7)            | 2.0 ( -1.8 to 5.6)            | 12.4 (8.6 to 16.1)             |

**Table F:** Subanalysis VE (CI95%) by study period, age group, days since 2nd dose and test and type of test.

|                   |                 | PCR solely based VE estimation |       |      | Antigen solely based VE estimation |                |
|-------------------|-----------------|--------------------------------|-------|------|------------------------------------|----------------|
|                   |                 | VE                             | CI95% | VE   | CI95%                              |                |
| Overall<br>period | All ages        | 30.7                           | 28.3  | 32.9 | 25.5                               | (23.3 to 27.7) |
|                   | 3-11 years old  | 25.6                           | 22.3  | 28.7 | 17.1                               | (13.6 to 20.5) |
|                   | 12-17 years old | 38.1                           | 34.7  | 41.3 | 34.2                               | (31.3 to 37.0) |
| Delta<br>period   | All ages        | 67.0                           | 63.8  | 70.0 | 60.6                               | (56.5 to 64.6) |
|                   | 3-11 years old  | 65.9                           | 60.0  | 70.9 | 53.6                               | (44.7 to 61.1) |
|                   | 12-17 years old | 68.3                           | 64.4  | 71.8 | 65.4                               | (60.8 to 69.4) |
| Omicron<br>period | All ages        | 20.0                           | 17.1  | 22.9 | 20.0                               | (17.4 to 22.5) |
|                   | 3-11 years old  | 18.5                           | 14.7  | 22.1 | 13.6                               | (9.7 to 17.3)  |

|                                            |                                      |      |      |      |      |                |
|--------------------------------------------|--------------------------------------|------|------|------|------|----------------|
|                                            | 12-17 years old                      | 23.1 | 18.0 | 27.8 | 27.7 | (24.2 to 31.0) |
| <b>Overall period</b><br>(12-17 years old) | 15-59 days between 2nd dose and test | 50.4 | 47.4 | 53.3 | 46.2 | (43.5 to 48.7) |
|                                            | ≥60 days between 2nd dose and test   | 22.8 | 18.1 | 27.2 | 23.2 | (19.6 to 26.6) |
| <b>Delta period</b><br>(12-17 years old)   | 15-59 days between 2nd dose and test | 69.9 | 66.0 | 73.3 | 66.7 | (62.1 to 70.7) |
|                                            | ≥60 days between 2nd dose and test   | 61.5 | 54.2 | 67.6 | 60.0 | (52.2 to 66.5) |
| <b>Omicron period</b><br>(12-17 years old) | 15-59 days between 2nd dose and test | 39.7 | 35.2 | 43.9 | 41.4 | (38.2 to 44.4) |
|                                            | ≥60 days between 2nd dose and test   | 8.2  | 1.7  | 14.2 | 17.2 | (12.9 to 21.2) |

**Figure A.** Association between PCR and antigen-based VE estimations. Each point depicts one subanalysis shown on Table S5. Dot size is inversely related to antigen-based confidence interval width. The black line shows the weighted linear regression and its equation and significance are shown in the upper left.

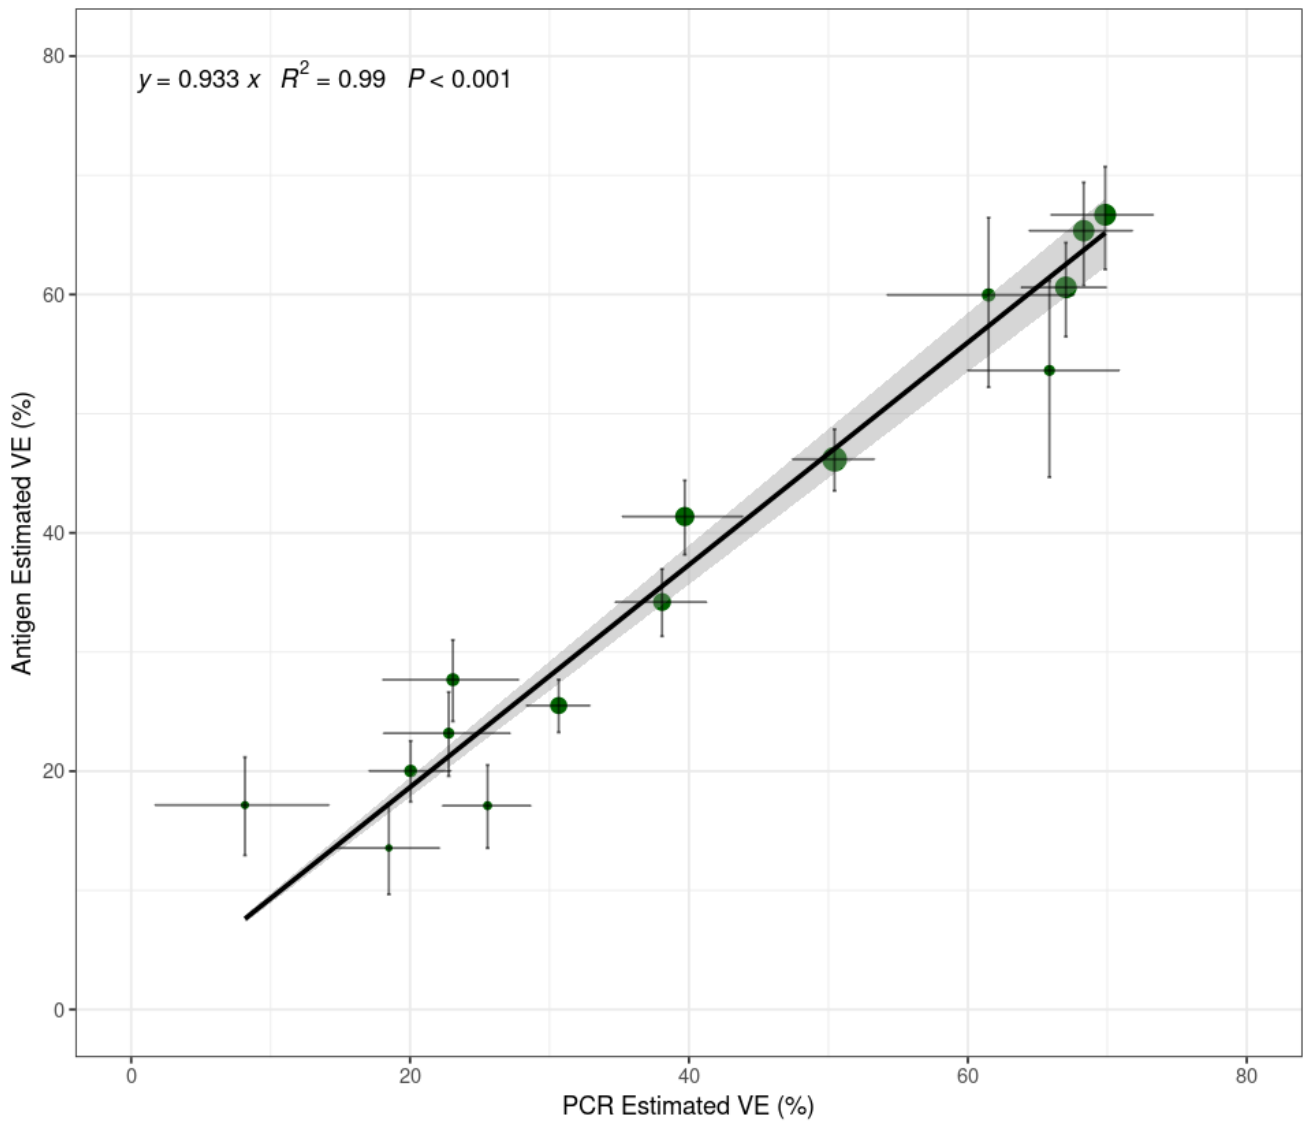

Weighted linear regression for antigen-based as a function of PCR-based estimates of VE. Weights as the reciprocal of the relative width of the IC are represented in the size of the points

**Table G:** Positivity assumption sensitivity analysis.

| Age group       | Main results (N) | Sensitivity analysis (N) | Main results VE (CI 95%) | Sensitivity analysis VE (CI 95%) |
|-----------------|------------------|--------------------------|--------------------------|----------------------------------|
| All ages        | 46953            | 37775                    | 64.2 (61.7 to 66.5)      | 65.0 (62.5 to 67.3)              |
| 3-11 years old  | 19190            | 10242                    | 61.2 (56.4 to 65.6)      | 62.7 (57.9 to 66.9)              |
| 12-17 years old | 27763            | 27533                    | 66.8 (63.9 to 69.5)      | 66.8 (63.8 to 69.5)              |

**Table H:** Previous infection sensitivity analysis (VE-CI95%).

| Study period   | Age Group       | Main result VE (CI 95%) | Sensitivity analysis VE (CI 95%) |
|----------------|-----------------|-------------------------|----------------------------------|
| Delta period   | All ages        | 64.2 (61.7 to 66.5)     | 64.1 (61.4 to 66.5)              |
|                | 3-11 years old  | 61.2 (61.7 to 66.5)     | 61.8 (56.9 to 66.2)              |
|                | 12-17 years old | 66.8 (63.9 to 69.5)     | 66.5 (63.3 to 69.3)              |
| Omicron period | All ages        | 19.9 (18.0 to 21.8)     | 19.1 (17.1 to 21.1)              |
|                | 3-11 years old  | 16.0 (13.2 to 18.6)     | 15.4 (12.7 to 18.2)              |
|                | 12-17 years old | 26.0 (23.2 to 28.8)     | 25.2 (22.1 to 28.1)              |
